# Supplementary material for: New Insights into the Formation of Viable but Nonculturable Escherichia coli O157:H7 Induced by High-Pressure CO2
Source: PubMed Central journal article supplement (PMC4999544; doi:10.1128/mbio.00961-16), 2016-08-30

**A**

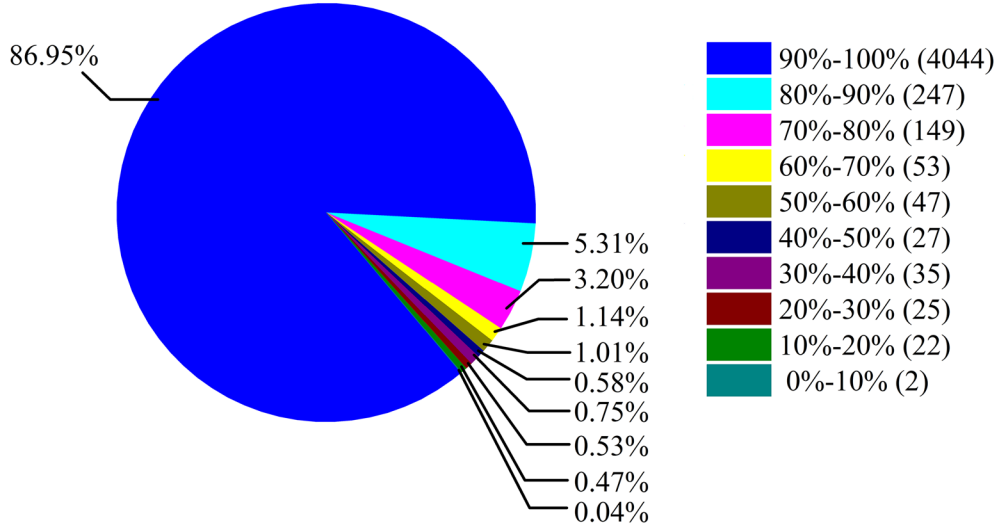

**B**

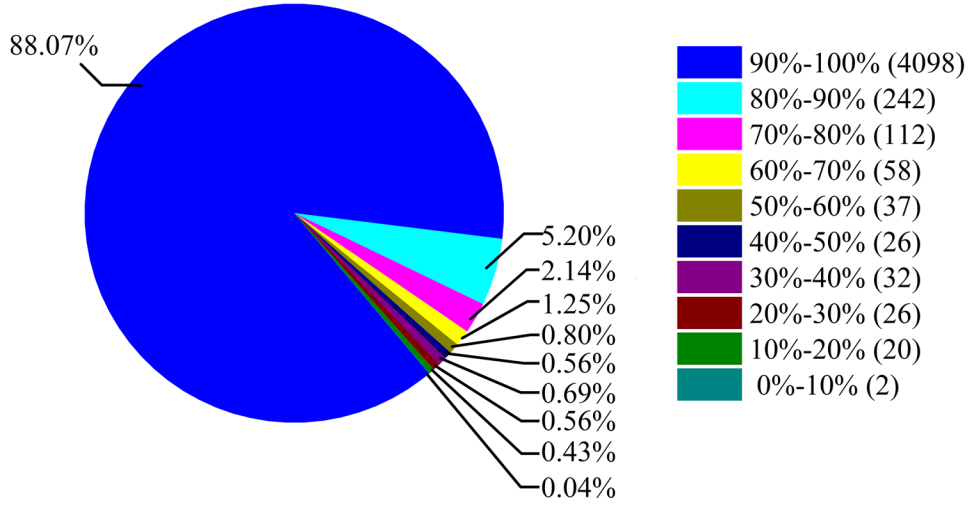

Supplement: mbo004162960sf2.pdf [file mbo004162960sf2.pdf]
