# Supplementary material for: New Insights into the Formation of Viable but Nonculturable Escherichia coli O157:H7 Induced by High-Pressure CO2
Source: PubMed Central journal article supplement (PMC4999544; doi:10.1128/mbio.00961-16), 2016-08-30
Supplement: mbo004162960sf4.pdf [file mbo004162960sf4.pdf]

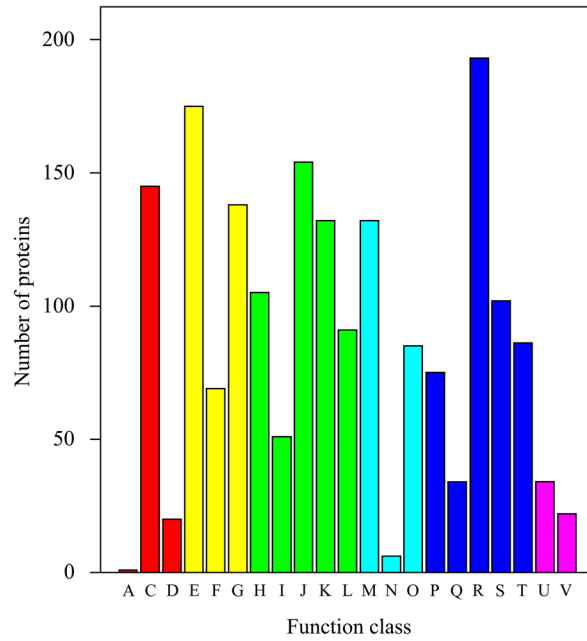

- A: RNA processing and modification
- C: Energy production and conversion
- D: Cell cycle control, cell division, chromosome partitioning
- E: Amino acid transport and metabolism
- F: Nucleotide transport and metabolism
- G: Carbohydrate transport and metabolism
- H: Coenzyme transport and metabolism
- I: Lipid transport and metabolism
- J: Translation, ribosomal structure and biogenesis
- K: Transcription
- L: Replication, recombination and repair
- M: Cell wall/membrane/envelope biogenesis
- N: Cell motility
- O: Posttranslational modification, protein turnover, chaperones
- P: Inorganic ion transport and metabolism
- Q: Secondary metabolites biosynthesis, transport and catabolism
- R: General function prediction only
- S: Function unknown
- T: Signal transduction mechanisms
- U: Intracellular trafficking, secretion, and vesicular transport
- V: Defense mechanisms
