# Supplementary material for: New Insights into the Formation of Viable but Nonculturable Escherichia coli O157:H7 Induced by High-Pressure CO2
Source: PubMed Central journal article supplement (PMC4999544; doi:10.1128/mbio.00961-16), 2016-08-30
Supplement: mbo004162960st1.pdf [file mbo004162960st1.pdf]

**Table S1. Summary of RNA-Seq data for *Escherichia coli* O157:H7 in the VBNC state and the exponential phase mapped to the reference genome.**

| Category             | Number of reads for the VBNC cells | Number of reads for the exponential-phase cells |
|----------------------|------------------------------------|-------------------------------------------------|
| Total reads          | 25674506                           | 25707052                                        |
| Total basepairs      | 2310705540                         | 2313634680                                      |
| Total mapped reads   | 24975882                           | 24944837                                        |
| Perfect match        | 20399683                           | 20749212                                        |
| ≤ 5 bp mismatch      | 4576199                            | 4195625                                         |
| Unique match         | 24434903                           | 23634364                                        |
| Multi-position match | 540979                             | 1310473                                         |
| Total unmapped reads | 698624                             | 762215                                          |
