# Supplementary material for: New Insights into the Formation of Viable but Nonculturable Escherichia coli O157:H7 Induced by High-Pressure CO2
Source: PubMed Central journal article supplement (PMC4999544; doi:10.1128/mbio.00961-16), 2016-08-30
Supplement: mbo004162960st3.pdf [file mbo004162960st3.pdf]

**Table S3. Summary of protein identification for the VBNC and exponential-phase *Escherichia coli* O157:H7 using the iTRAQ platform.**

| Category       | Identified number |
|----------------|-------------------|
| Total spectra  | 241021            |
| Spectra        | 22206             |
| Unique spectra | 22165             |
| Peptide        | 7215              |
| Unique peptide | 7194              |
| Protein        | 1573              |
