# Supplementary material for: New Insights into the Formation of Viable but Nonculturable Escherichia coli O157:H7 Induced by High-Pressure CO2
Source: PubMed Central journal article supplement (PMC4999544; doi:10.1128/mbio.00961-16), 2016-08-30
Supplement: mbo004162960st4.pdf [file mbo004162960st4.pdf]

**Table S4. Differentially expressed proteins in the VBNC *Escherichia coli* O157:H7 cells induced by high pressure CO<sub>2</sub>.**

| Protein and functional category                           | Accession number <sup>a</sup> | Gene         | Fold change <sup>b</sup> |
|-----------------------------------------------------------|-------------------------------|--------------|--------------------------|
| <b>Carbohydrate transport and metabolism</b>              |                               |              |                          |
| Pyruvate dehydrogenase subunit E1                         | NP_285810.1                   | <i>aceE</i>  | 1.51                     |
| Aconitate hydratase 2                                     | NP_285814.1                   | <i>acnB</i>  | 0.72                     |
| Type II citrate synthase                                  | NP_286436.1                   | <i>gltA</i>  | 1.85                     |
| D-lactate dehydrogenase                                   | NP_287766.1                   | <i>ldhA</i>  | 1.53                     |
| Glucose-6-phosphate dehydrogenase                         | NP_288289.1                   | <i>zwf</i>   | 1.62                     |
| 6-phosphogluconate dehydrogenase                          | NP_288534.1                   | <i>gnd</i>   | 1.33                     |
| β-D-glucoside glucohydrolase                              | NP_288709.1                   | <i>bglX</i>  | 0.56                     |
| D-lactate dehydrogenase                                   | NP_288710.1                   | <i>dld</i>   | 0.21                     |
| Phosphoenolpyruvate-protein phosphotransferase            | NP_288978.1                   | <i>ptsI</i>  | 0.61                     |
| Maltose ABC transporter ATP-binding protein               | NP_290669.1                   | <i>malK</i>  | 2.40                     |
| <b>Amino acid transport and metabolism</b>                |                               |              |                          |
| Threonine synthase                                        | NP_285696.1                   | <i>thrC</i>  | 2.23                     |
| Lysine-, arginine-, ornithine-binding periplasmic protein | NP_288884.1                   | <i>argT</i>  | 2.22                     |
| D-3-phosphoglycerate dehydrogenase                        | NP_289481.1                   | <i>serA</i>  | 1.49                     |
| <b>Nucleotide metabolism</b>                              |                               |              |                          |
| Carbamoyl phosphate synthase large subunit                | NP_285727.1                   | <i>carB</i>  | 0.59                     |
| Adenylate kinase                                          | NP_286215.1                   | <i>adk</i>   | 1.34                     |
| Ribonucleoside-diphosphate reductase subunit α            | NP_288808.1                   | <i>nrdA</i>  | 2.14                     |
| Inosine 5'-monophosphate dehydrogenase                    | NP_289062.1                   | <i>guaB</i>  | 0.41                     |
| Phosphoribosylformylglycinamide synthase                  | NP_289113.1                   | <i>purL</i>  | 0.60                     |
| Ribokinase                                                | NP_290391.1                   | <i>rbsK</i>  | 0.64                     |
| Adenylosuccinate synthetase                               | NP_290807.1                   | <i>purA</i>  | 1.60                     |
| <b>DNA replication</b>                                    |                               |              |                          |
| DNA polymerase III subunit α                              | NP_285878.1                   | <i>dnaE</i>  | 0.36                     |
| Replication initiation regulator SeqA                     | NP_286402.1                   | <i>seqA</i>  | 1.76                     |
| <b>Transcription and translation</b>                      |                               |              |                          |
| Isoleucyl-tRNA synthetase                                 | NP_285720.1                   | <i>ileS</i>  | 1.48                     |
| Glutamyl-tRNA synthetase                                  | NP_286394.1                   | <i>glnS</i>  | 2.12                     |
| 30S ribosomal protein S1                                  | NP_286786.1                   | <i>rpsA</i>  | 0.79                     |
| DNA topoisomerase I                                       | NP_287925.1                   | <i>topA</i>  | 1.88                     |
| Transcription elongation factor GreA                      | NP_289755.2                   | <i>greA</i>  | 1.64                     |
| 30S ribosomal protein S4                                  | NP_289857.1                   | <i>rpsD</i>  | 1.39                     |
| 30S ribosomal protein S5                                  | NP_289864.1                   | <i>rpsE</i>  | 0.75                     |
| 50S ribosomal protein L24                                 | NP_289870.1                   | <i>rplX</i>  | 1.55                     |
| Glycyl-tRNA synthetase subunit α                          | NP_290144.1                   | <i>glyQ</i>  | 0.33                     |
| Fic family protein                                        | NP_290168.1                   | <i>z5009</i> | 0.25                     |

|                                                                       |             |              |  |      |
|-----------------------------------------------------------------------|-------------|--------------|--|------|
| <b>Cell division</b>                                                  |             |              |  |      |
| DamX protein                                                          | NP_289927.1 | <i>damX</i>  |  | 1.85 |
| <b>Stress response</b>                                                |             |              |  |      |
| Heat shock protein 90                                                 | NP_286214.1 | <i>htpG</i>  |  | 1.51 |
| Glucan biosynthesis protein D                                         | NP_287736.1 | <i>mdoD</i>  |  | 0.56 |
| Molecular chaperone GroEL                                             | NP_290776.1 | <i>groEL</i> |  | 1.24 |
| <b>Electron transfer chain</b>                                        |             |              |  |      |
| Glutamate-1-semialdehyde aminotransferase                             | NP_285850.1 | <i>hemL</i>  |  | 1.99 |
| <b>Membrane biosynthesis and transport</b>                            |             |              |  |      |
| Outer membrane protein F                                              | NP_286804.1 | <i>ompF</i>  |  | 1.71 |
| UTP-glucose-1-phosphate uridylyltransferase                           | NP_287481.1 | <i>galU</i>  |  | 2.10 |
| <i>sn</i> -glycerol-3-phosphate dehydrogenase subunit A               | NP_288817.1 | <i>glpA</i>  |  | 0.43 |
| Undecaprenyl phosphate 4-deoxy-4-formamido-L-arabinose transferase    | NP_288830.1 | <i>z3512</i> |  | 0.27 |
| Aminoglycoside/multidrug efflux system                                | NP_289022.1 | <i>acrD</i>  |  | 0.22 |
| D-arabinose 5-phosphate isomerase                                     | NP_289257.2 | <i>gutQ</i>  |  | 0.33 |
| NAD(P)H-dependent <i>sn</i> -glycerol-3-phosphate dehydrogenase       | NP_290191.1 | <i>gpsA</i>  |  | 1.59 |
| <b>Pathogenicity</b>                                                  |             |              |  |      |
| Outer membrane protein A                                              | NP_286832.1 | <i>ompA</i>  |  | 0.79 |
| Keto-hydroxyglutarate-aldolase                                        | NP_288287.1 | <i>eda</i>   |  | 0.67 |
| <b>RNA degradation</b>                                                |             |              |  |      |
| Exoribonuclease R                                                     | NP_290809.2 | <i>vacB</i>  |  | 0.44 |
| <b>Protein degradation</b>                                            |             |              |  |      |
| Isoaspartyl dipeptidase                                               | NP_290945.1 | <i>iadA</i>  |  | 0.60 |
| <b>Coenzyme metabolism</b>                                            |             |              |  |      |
| Thiamine biosynthesis protein ThiI                                    | NP_286165.1 | <i>yajK</i>  |  | 0.38 |
| Lipoyl synthase                                                       | NP_286354.1 | <i>lipA</i>  |  | 0.68 |
| <b>Function prediction only</b>                                       |             |              |  |      |
| Phage inhibition, colicin resistance and tellurite resistance protein | NP_286707.1 | <i>terA</i>  |  | 0.31 |
| Outer membrane protein assembly complex subunit YfiO                  | NP_289150.1 | <i>z3889</i> |  | 0.47 |
| ABC transporter ATP-binding protein                                   | NP_289900.1 | <i>yheS</i>  |  | 0.28 |
| <b>Function unknown</b>                                               |             |              |  |      |
| Hypothetical protein                                                  | NP_285859.1 | <i>yaeH</i>  |  | 2.26 |
| Hypothetical protein                                                  | NP_288049.1 | <i>ydgA</i>  |  | 0.48 |
| Hypothetical protein                                                  | NP_289066.1 | <i>z3776</i> |  | 2.34 |

<sup>a</sup>Accession number was from the NCBI database.

<sup>b</sup>Changed expression levels in VBNC cells compared to those in the exponential-phase cells.
