# Supplementary material for: New Insights into the Formation of Viable but Nonculturable Escherichia coli O157:H7 Induced by High-Pressure CO2
Source: PubMed Central journal article supplement (PMC4999544; doi:10.1128/mbio.00961-16), 2016-08-30
Supplement: mbo004162960st5.pdf [file mbo004162960st5.pdf]

**Table S5. Oligonucleotide primers used in this study.**

| Primer  | Sequence (5'-3')                         |
|---------|------------------------------------------|
| Z2046-F | CATG <u>CCATGG</u> GATTGAAAATTGATGCTATAG |
| Z2046-R | GGG <u>GTACC</u> GTTTCAGTGGTGATTTTCATTGT |
| OmpF-F  | CATG <u>CCATGG</u> GAAATGAAGCGCAATATTCTG |
| OmpF-R  | GGG <u>GTACC</u> GCTATTAGAACTGGTAAACGAT  |

Underlined sequences CCATGG and GTACC represent restriction sites *Nco*I and *Kpn*I, respectively.
